# Supplementary material
Source: ML conference proceedings conference paper supplement (https://openreview.net/forum?id=SLcxbOUi9gq)

$\rho=0.25$

Out-of-Sample MSE (log10)

Gaussian

4.2  
4.0  
3.8  
3.6

0.5

1.0

2.0

Measurement Error Level

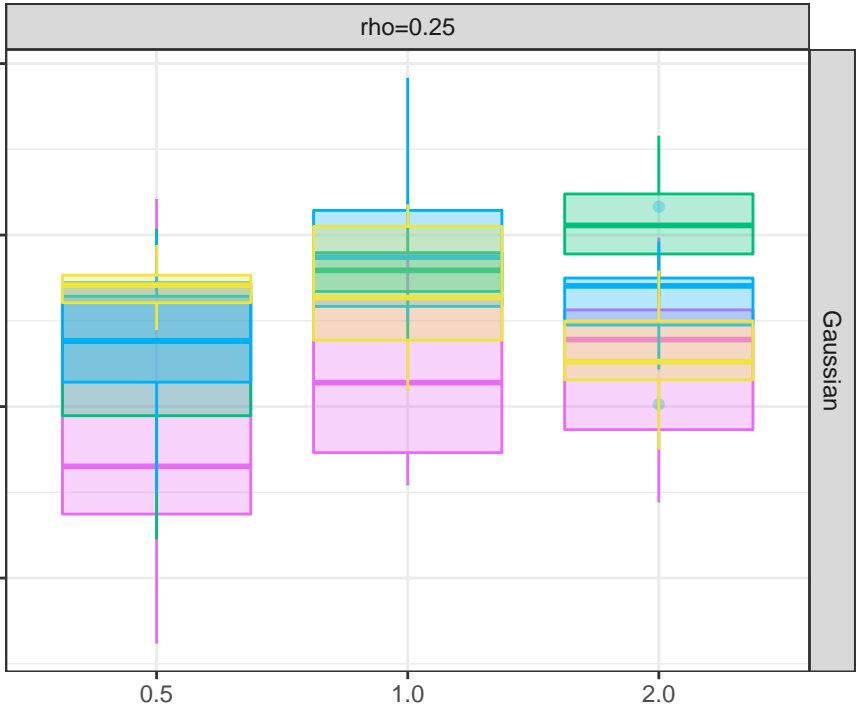

Supplement: supplementary_material [file attachment]

$\rho=0.5$

Out-of-Sample MSE (log10)

Gaussian

4.1  
4.0  
3.9  
3.8  
3.7  
3.6

0.5

1.0

2.0

Measurement Error Level

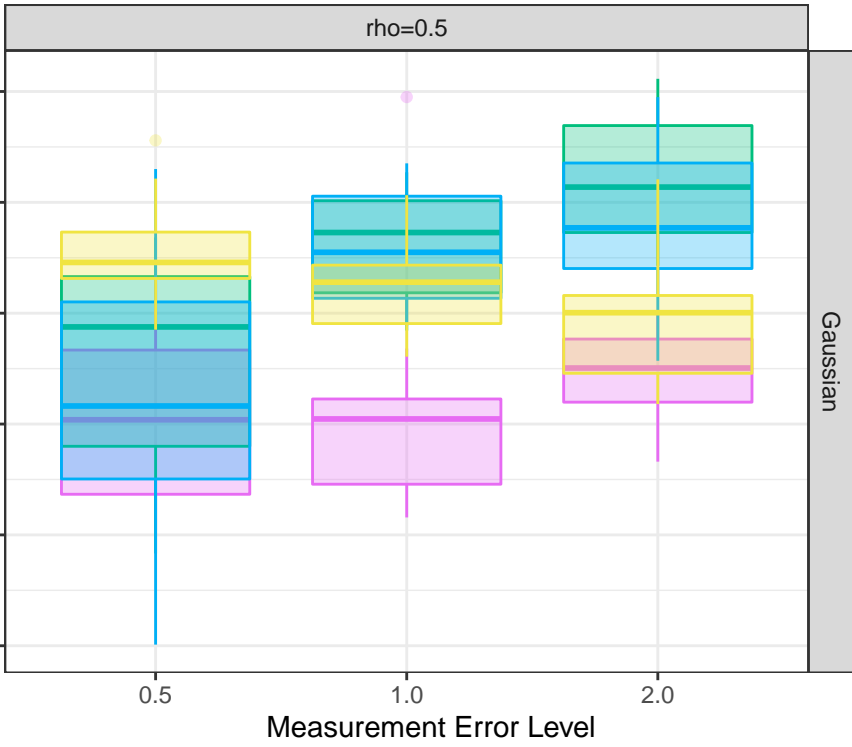

Supplement: supplementary_material [file attachment]

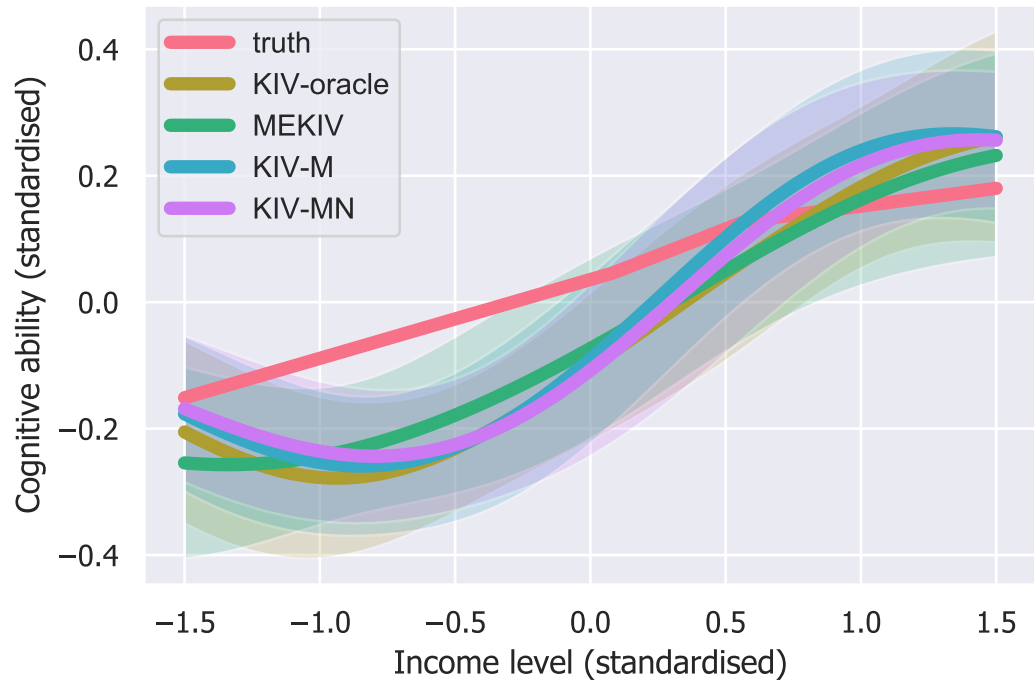

Supplement: supplementary_material [file attachment]

merror scale: 2.0, type: gaussian

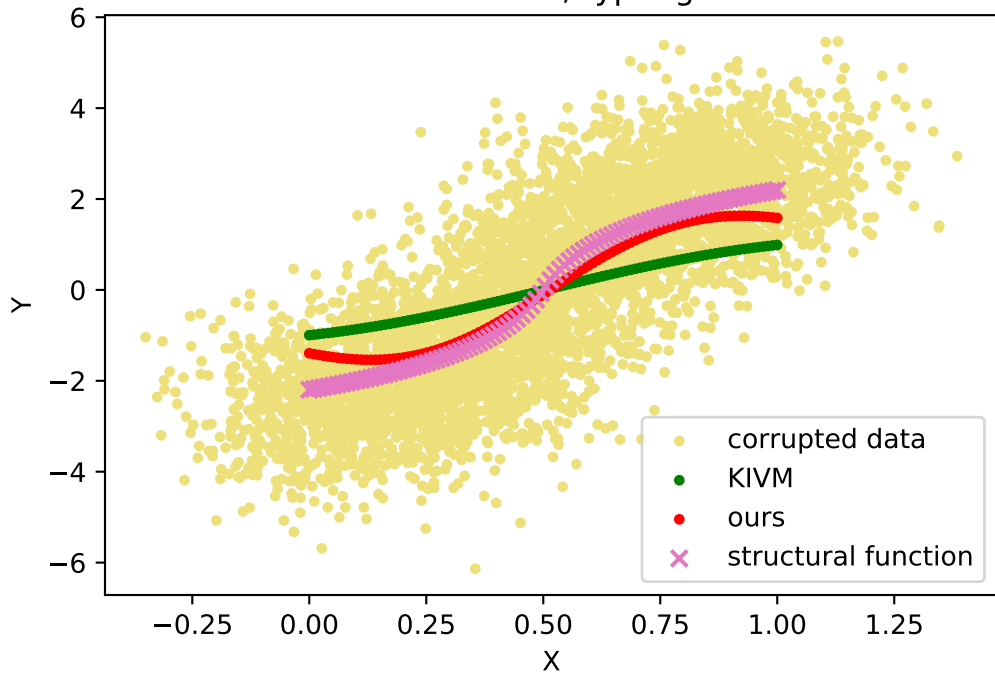

Supplement: supplementary_material [file attachment]

# Algorithm

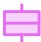

KIV-Oracle

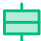

KIV-M

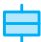

KIV-MN

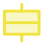

MEKIV

Supplement: supplementary_material [file attachment]

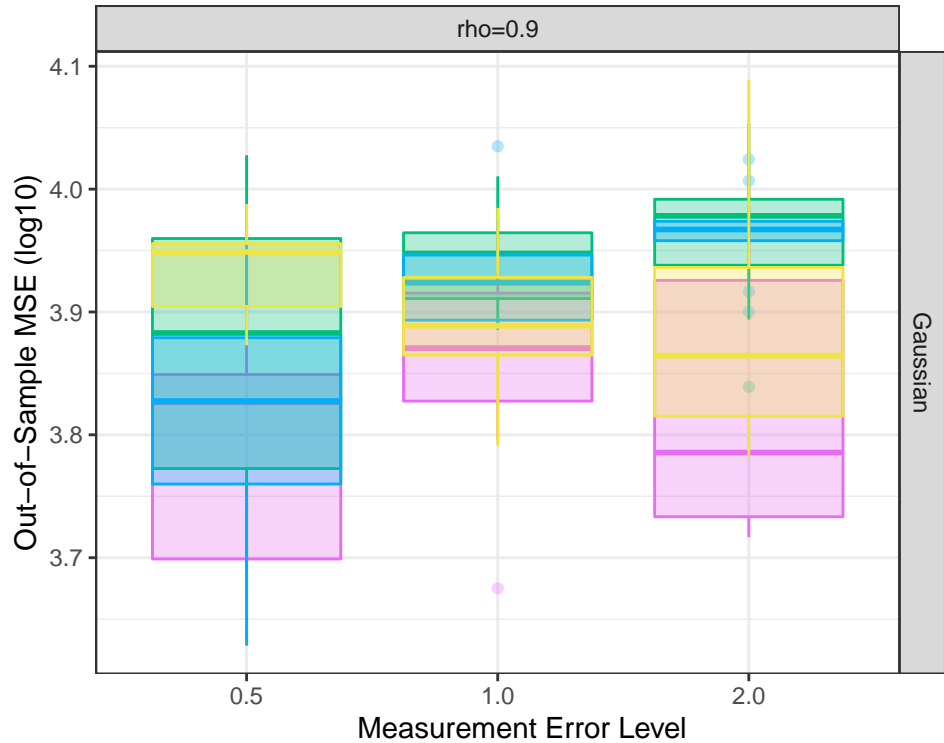

Supplement: supplementary_material [file attachment]
